# Supplementary material for: Artificial Neural Networks Model for Predicting Type 2 Diabetes Mellitus Based on VDR Gene FokI Polymorphism, Lipid Profile and Demographic Data
Source: PubMed Central journal article supplement (PMC7465516; doi:10.3390/biology9080222), 2020-08-13
Supplement: biology-09-00222-s001.pdf [file biology-09-00222-s001.pdf]

**Table S1.** Participants' data.

| Diabetes Status | TG  | LDL   | HDL  | CH  | FBS | Gender | Age | <i>FokI</i> genotype |
|-----------------|-----|-------|------|-----|-----|--------|-----|----------------------|
| 1               | 266 | 66.8  | 30   | 150 | 228 | F      | 46  | CC                   |
| 1               | 273 | 55.4  | 49   | 159 | 155 | M      | 64  | CT                   |
| 1               | 213 | 105.4 | 32   | 180 | 201 | M      | 65  | CC                   |
| 1               | 166 | 179.8 | 43   | 256 | 257 | F      | 51  | CT                   |
| 1               | 104 | 239.2 | 45   | 305 | 233 | M      | 58  | CT                   |
| 1               | 253 | 72.4  | 49   | 172 | 89  | F      | 54  | CC                   |
| 1               | 197 | 53.6  | 25   | 117 | 147 | M      | 60  | CT                   |
| 1               | 73  | 72.4  | 53   | 140 | 249 | F      | 55  | CT                   |
| 1               | 250 | 29    | 41   | 120 | 393 | F      | 60  | CC                   |
| 1               | 77  | 143.6 | 49   | 208 | 84  | M      | 50  | CC                   |
| 1               | 140 | 57    | 52   | 137 | 24  | F      | 60  | TT                   |
| 1               | 63  | 48.4  | 31   | 92  | 310 | F      | 56  | CT                   |
| 1               | 118 | 42    | 43   | 109 | 242 | M      | 65  | CT                   |
| 1               | 237 | 28    | 78   | 154 | 170 | M      | 65  | CC                   |
| 1               | 133 | 39    | 128  | 190 | 249 | M      | 38  | CC                   |
| 1               | 70  | 53    | 37   | 104 | 401 | M      | 39  | CC                   |
| 1               | 96  | 47    | 105  | 171 | 203 | M      | 72  | CC                   |
| 1               | 155 | 28    | 99   | 158 | 226 | M      | 50  | TT                   |
| 1               | 140 | 23    | 86   | 137 | 126 | M      | 63  | CT                   |
| 1               | 142 | 151.6 | 29   | 209 | 198 | M      | 75  | TT                   |
| 1               | 202 | 73.6  | 27   | 141 | 370 | F      | 42  | CC                   |
| 1               | 115 | 163   | 45   | 231 | 170 | F      | 60  | CC                   |
| 1               | 138 | 150.4 | 56   | 234 | 410 | F      | 33  | CC                   |
| 1               | 230 | 178   | 22   | 246 | 278 | M      | 65  | CT                   |
| 1               | 306 | 127   | 18   | 169 | 309 | M      | 52  | TT                   |
| 1               | 160 | 118   | 51   | 201 | 122 | M      | 80  | CC                   |
| 1               | 213 | 134.4 | 29   | 206 | 321 | F      | 54  | CT                   |
| 1               | 306 | 59    | 16   | 213 | 144 | M      | 60  | CT                   |
| 1               | 133 | 149.4 | 28   | 204 | 268 | F      | 51  | CC                   |
| 1               | 200 | 127   | 31   | 198 | 334 | F      | 47  | TT                   |
| 1               | 248 | 121.4 | 36   | 207 | 405 | F      | 54  | CC                   |
| 1               | 294 | 40.2  | 41   | 140 | 270 | F      | 50  | CC                   |
| 1               | 294 | 39.2  | 16   | 114 | 195 | M      | 66  | CC                   |
| 1               | 142 | 60.6  | 25   | 114 | 230 | M      | 57  | CC                   |
| 1               | 250 | 23    | 26   | 99  | 197 | F      | 50  | CC                   |
| 1               | 276 | 133   | 18   | 196 | 110 | M      | 72  | CT                   |
| 1               | 290 | 59    | 26   | 143 | 270 | F      | 59  | CC                   |
| 1               | 484 | 127   | 23   | 160 | 201 | M      | 52  | CC                   |
| 1               | 108 | 49.4  | 26   | 97  | 158 | F      | 52  | CC                   |
| 1               | 338 | 145   | 26   | 111 | 230 | M      | 37  | CT                   |
| 1               | 200 | 133   | 23   | 196 | 114 | F      | 48  | CT                   |
| 1               | 372 | 81.6  | 29   | 185 | 219 | F      | 49  | CC                   |
| 1               | 266 | 73.8  | 27   | 154 | 390 | F      | 57  | CC                   |
| 1               | 296 | 150.8 | 24   | 234 | 158 | F      | 45  | CC                   |
| 1               | 234 | 131.2 | 38   | 216 | 283 | M      | 43  | CT                   |
| 1               | 142 | 198.6 | 37   | 264 | 129 | F      | 44  | CC                   |
| 1               | 230 | 145   | 21   | 230 | 274 | F      | 50  | CC                   |
| 1               | 272 | 117.6 | 33   | 205 | 351 | F      | 46  | CT                   |
| 1               | 186 | 45.8  | 22   | 105 | 170 | F      | 52  | CT                   |
| 1               | 187 | 100.4 | 36   | 187 | 141 | F      | 54  | CT                   |
| 1               | 178 | 65.2  | 24.2 | 125 | 348 | M      | 66  | CC                   |
| 1               | 295 | 94.1  | 24.9 | 178 | 174 | F      | 50  | CT                   |
| 1               | 181 | 66.6  | 24.2 | 177 | 194 | M      | 57  | CC                   |

|   |     |       |      |     |     |   |    |    |
|---|-----|-------|------|-----|-----|---|----|----|
| 1 | 230 | 6     | 55   | 107 | 165 | F | 59 | CT |
| 1 | 331 | 1.37  | 28.2 | 232 | 123 | M | 52 | CT |
| 1 | 226 | 61.7  | 43.9 | 151 | 136 | F | 52 | CC |
| 1 | 411 | 1.6   | 28.2 | 112 | 122 | M | 37 | CC |
| 1 | 142 | 83    | 58   | 195 | 225 | F | 50 | CC |
| 1 | 77  | 94.8  | 49.8 | 160 | 139 | M | 72 | CC |
| 1 | 174 | 73.6  | 42.6 | 151 | 205 | F | 48 | CC |
| 1 | 142 | 133   | 28   | 191 | 225 | M | 55 | CT |
| 1 | 266 | 145   | 41   | 109 | 182 | F | 51 | CC |
| 1 | 355 | 5     | 34   | 110 | 236 | M | 50 | CC |
| 1 | 186 | 49.4  | 31   | 193 | 162 | F | 71 | TT |
| 1 | 366 | 36.8  | 24   | 134 | 209 | M | 42 | CT |
| 1 | 271 | 116.8 | 30   | 201 | 119 | M | 58 | CT |
| 1 | 310 | 104   | 28   | 194 | 147 | F | 55 | CT |
| 1 | 168 | 83.4  | 50   | 167 | 273 | F | 54 | CT |
| 1 | 355 | 83    | 33   | 187 | 262 | M | 57 | CT |
| 1 | 168 | 135.4 | 58   | 227 | 135 | F | 48 | CC |
| 1 | 133 | 61.4  | 34   | 122 | 433 | M | 42 | CC |
| 1 | 90  | 116   | 31   | 165 | 355 | F | 54 | CT |
| 1 | 228 | 12.04 | 41   | 207 | 205 | F | 20 | CC |
| 1 | 81  | 116   | 50   | 162 | 138 | F | 41 | CT |
| 1 | 320 | 61.8  | 69   | 272 | 181 | F | 60 | CC |
| 1 | 265 | 44.8  | 54   | 191 | 275 | M | 53 | CT |
| 1 | 333 | 83    | 40   | 278 | 276 | F | 45 | CC |
| 1 | 391 | 51    | 41   | 177 | 475 | F | 55 | CT |
| 1 | 187 | 58.6  | 35   | 131 | 155 | M | 50 | CC |
| 1 | 170 | 94    | 47   | 175 | 201 | F | 53 | CC |
| 1 | 178 | 151.4 | 20   | 207 | 329 | F | 55 | TT |
| 1 | 111 | 122   | 56   | 200 | 127 | M | 57 | CC |
| 2 | 76  | 86    | 38   | 139 | 102 | M | 61 | CT |
| 2 | 90  | 93    | 51   | 162 | 103 | M | 58 | CC |
| 2 | 119 | 96    | 49   | 166 | 89  | M | 72 | CC |
| 2 | 557 | 152   | 32   | 295 | 132 | M | 71 | CC |
| 2 | 175 | 148   | 48   | 231 | 96  | M | 66 | CT |
| 2 | 109 | 108   | 51   | 181 | 93  | F | 47 | CC |
| 2 | 170 | 82    | 60   | 176 | 96  | F | 67 | CC |
| 2 | 125 | 93    | 76   | 250 | 92  | F | 36 | CC |
| 2 | 217 | 160   | 36   | 239 | 102 | F | 42 | CT |
| 2 | 113 | 143   | 56   | 222 | 94  | F | 63 | CT |
| 2 | 112 | 147   | 34   | 203 | 89  | M | 68 | CT |
| 2 | 102 | 104   | 58   | 182 | 95  | F | 47 | CC |
| 2 | 208 | 138   | 37   | 217 | 87  | M | 62 | CC |
| 2 | 226 | 102   | 33   | 184 | 98  | M | 50 | CC |
| 2 | 129 | 125   | 45   | 196 | 99  | M | 42 | CC |
| 2 | 135 | 153   | 36   | 216 | 101 | M | 51 | CC |
| 2 | 155 | 108   | 37   | 176 | 95  | M | 53 | CC |
| 2 | 72  | 113   | 75   | 202 | 92  | F | 37 | CC |
| 2 | 194 | 144   | 51   | 234 | 95  | F | 43 | CC |
| 2 | 119 | 125   | 54   | 203 | 92  | M | 49 | CC |
| 2 | 53  | 110   | 56   | 177 | 102 | F | 26 | CC |
| 2 | 138 | 158   | 37   | 223 | 93  | M | 51 | CT |
| 2 | 37  | 82    | 66   | 155 | N/A | F | 30 | CC |
| 2 | 89  | 121   | 54   | 193 | 87  | M | 36 | TT |
| 2 | 81  | 100   | 54   | 170 | 80  | M | 20 | TT |
| 2 | 209 | 142   | 32   | 216 | 103 | M | 42 | CC |
| 2 | 89  | 98    | 53   | 168 | 102 | M | 58 | CC |
| 2 | 123 | 120   | 37   | 182 | 106 | M | 44 | CT |
| 2 | 104 | 88    | 74   | 183 | N/A | F | 56 | CT |

|   |     |     |    |     |     |   |    |    |
|---|-----|-----|----|-----|-----|---|----|----|
| 2 | 109 | 106 | 39 | 167 | 104 | M | 29 | CC |
| 2 | 117 | 124 | 55 | 202 | N/A | F | 46 | CC |
| 2 | 128 | 110 | 54 | 190 | 99  | M | 54 | TT |
| 2 | 155 | 63  | 74 | 168 | N/A | F | 57 | CC |
| 2 | 71  | 75  | 34 | 123 | 83  | M | 33 | CC |
| 2 | 140 | 101 | 46 | 175 | 91  | F | 57 | CC |
| 2 | 91  | 112 | 80 | 206 | 92  | F | 31 | CT |
| 2 | 192 | 84  | 43 | 165 | 111 | M | 44 | CT |
| 2 | 105 | 130 | 46 | 197 | 115 | M | 53 | CC |
| 2 | 112 | 89  | 60 | 171 | 93  | F | 87 | TT |
| 2 | 103 | 137 | 45 | 203 | 100 | M | 61 | TT |
| 2 | 121 | 138 | 52 | 214 | 86  | M | 55 | CC |
| 2 | 59  | 143 | 68 | 227 | N/A | F | 40 | TT |
| 2 | 63  | 188 | 86 | 287 | 88  | M | 54 | CT |
| 2 | 178 | 110 | 58 | 204 | 100 | M | 47 | CC |
| 2 | 221 | 63  | 33 | 140 | 100 | M | 44 | CT |
| 2 | 133 | 157 | 59 | 243 | 99  | M | 54 | CT |
| 2 | 168 | 116 | 41 | 191 | 102 | F | 35 | CC |
| 2 | 169 | 116 | 41 | 191 | 102 | F | 55 | CC |
| 2 | 91  | 132 | 52 | 202 | 102 | F | 60 | CT |
| 2 | 248 | 185 | 25 | 260 | 95  | M | 35 | CC |
| 2 | 163 | 144 | 31 | 208 | 82  | M | 47 | CT |
| 2 | 178 | 97  | 57 | 190 | 94  | F | 46 | CT |
| 2 | 218 | 97  | 47 | 188 | 90  | F | 37 | CC |
| 2 | 86  | 144 | 65 | 216 | 91  | F | 50 | CT |
| 2 | 96  | 147 | 54 | 220 | N/A | F | 31 | CC |
| 2 | 106 | 74  | 53 | 147 | 92  | F | 77 | CC |
| 2 | 376 | 207 | 31 | 313 | 98  | M | 54 | CT |
| 2 | 142 | 132 | 63 | 227 | 110 | F | 54 | CC |
| 2 | 177 | 105 | 40 | 181 | N/A | F | 63 | CT |
| 2 | 103 | 104 | 63 | 188 | 102 | F | 41 | CC |
| 2 | 134 | 85  | 34 | 151 | 92  | M | 42 | CC |
| 2 | 74  | 79  | 47 | 141 | 97  | F | 57 | CC |
| 2 | 282 | 139 | 30 | 225 | 123 | M | 45 | CC |
| 2 | 197 | 82  | 47 | 168 | N/A | F | 34 | CC |
| 2 | 239 | 240 | 44 | 309 | 107 | F | 62 | CT |
| 2 | 71  | 194 | 57 | 270 | 91  | M | 47 | CC |
| 2 | 90  | 185 | 59 | 262 | N/A | F | 46 | CC |
| 2 | 69  | 132 | 63 | 209 | 94  | F | 37 | CC |
| 2 | 43  | 76  | 92 | 177 | 80  | F | 24 | CT |
| 2 | 78  | 156 | 42 | 214 | 116 | M | 42 | CT |
| 2 | 138 | 120 | 58 | 204 | 92  | F | 49 | CC |
| 2 | 299 | 110 | 31 | 201 | 85  | M | 36 | CT |
| 2 | 146 | 115 | 67 | 211 | 102 | F | 69 | CC |
| 2 | 208 | 141 | 53 | 235 | N/A | F | 58 | CT |
| 2 | 184 | 141 | 47 | 225 | 101 | F | 55 | CT |
| 2 | 142 | 151 | 47 | 226 | 129 | F | 70 | CC |
| 2 | 144 | 142 | 36 | 207 | 115 | F | 68 | CC |
| 2 | 102 | 80  | 67 | 195 | N/A | F | 41 | CC |
| 2 | 41  | 44  | 73 | 125 | 94  | F | 52 | CC |
| 2 | 48  | 112 | 58 | 180 | N/A | F | 38 | CT |
| 2 | 117 | 144 | 61 | 228 | 89  | F | 59 | CT |
| 2 | 197 | 113 | 52 | 204 | N/A | F | 49 | CC |

---

Diabetes status: 1, diabetic; 2, healthy. Results calculated in mg/dL.

**Table S2.** Association of *FoKI* polymorphism with response diabetes ( $n = 164$ , adjusted by TG + LDL + HDL + CH + Gender + age) (performed by snpStats at [www.snpstats.net/analyzer.php](http://www.snpstats.net/analyzer.php)).

| Model        | Genotype | Diabetes = 0<br><i>n</i> (%) | Diabetes = 1<br><i>n</i> (%) | OR (95% CI)      | <i>P</i> -Value | AIC   | BIC   |
|--------------|----------|------------------------------|------------------------------|------------------|-----------------|-------|-------|
| Codominant   | C/C      | 49 (59.8%)                   | 44 (53.7%)                   | 1.00             | 0.54            | 182   | 209.9 |
|              | C/T      | 27 (32.9%)                   | 31 (37.8%)                   | 1.38 (0.60–3.17) |                 |       |       |
|              | T/T      | 6 (7.3%)                     | 7 (8.5%)                     | 1.98 (0.48–8.21) |                 |       |       |
| Dominant     | C/C      | 49 (59.8%)                   | 44 (53.7%)                   | 1.00             | 0.32            | 180.2 | 205   |
|              | C/T-T/T  | 33 (40.2%)                   | 38 (46.3%)                   | 1.48 (0.68–3.24) |                 |       |       |
| Recessive    | C/C-C/T  | 76 (92.7%)                   | 75 (91.5%)                   | 1.00             | 0.42            | 180.6 | 205.4 |
|              | T/T      | 6 (7.3%)                     | 7 (8.5%)                     | 1.75 (0.44–7.01) |                 |       |       |
| Overdominant | C/C-T/T  | 55 (67.1%)                   | 51 (62.2%)                   | 1.00             | 0.57            | 180.9 | 205.7 |
|              | C/T      | 27 (32.9%)                   | 31 (37.8%)                   | 1.26 (0.56–2.83) |                 |       |       |
| Log-additive | ---      | ---                          | ---                          | 1.40 (0.77–2.54) | 0.27            | 180   | 204.8 |

**Table S3.** *FoKI* polymorphism and Gender cross-classification interaction table ( $n = 164$ , adjusted by TG + LDL + HDL + CH + age) (performed by snpStats at [www.snpstats.net/analyzer.php](http://www.snpstats.net/analyzer.php)).

|     | Female       |              |                   | Male         |              |                  |
|-----|--------------|--------------|-------------------|--------------|--------------|------------------|
|     | Diabetes = 0 | Diabetes = 1 | OR (95% CI)       | Diabetes = 0 | Diabetes = 1 | OR (95% CI)      |
| C/C | 29           | 26           | 1.00              | 20           | 18           | 0.70 (0.25–1.97) |
| C/T | 14           | 15           | 1.56 (0.51–4.77)  | 13           | 16           | 0.83 (0.26–2.67) |
| T/T | 2            | 4            | 2.06 (0.23–18.85) | 4            | 3            | 1.32 (0.21–8.08) |

Interaction *p*-value: 0.95.**Table S4.** ANOVA analysis for different lipid parameters among different genotypes for people with diabetes and people with no diabetes (horizontal *p*-values), and unpaired t-test analysis for different genotypes among people with diabetes and people with no diabetes for all lipid profile parameters (vertical *p*-values).

| Parameter (mg/dL) | Diabetes Status         | CC              | CT              | TT              | F-Ratio Value | <i>P</i> -Value |
|-------------------|-------------------------|-----------------|-----------------|-----------------|---------------|-----------------|
| TC                | People with diabetes    | 170.5<br>(48.9) | 176.8<br>(79.2) | 181.6<br>(27.4) | 0.26          | 0.77            |
|                   | People with no diabetes | 196.2<br>(35.6) | 212.7<br>(42.5) | 192.3<br>(21.3) |               |                 |
|                   | <i>p</i> -value         |                 | 0.00            | 0.00            | 0.45          |                 |
| TG                | People with diabetes    | 214.1<br>(93.8) | 221.6<br>(92.6) | 186.7<br>(57.3) | 0.42          | 0.66            |
|                   | People with no diabetes | 142.3<br>(80.9) | 149.8<br>(77.9) | 95.3<br>(24.4)  |               |                 |
|                   | <i>p</i> -value         |                 | 0.00            | 0.00            | 0.00          |                 |
| HDL               | People with diabetes    | 41.8<br>(21.3)  | 36.0<br>(14.6)  | 40<br>(28.3)    | 0.80          | 0.45            |
|                   | People with no diabetes | 50.6<br>(12.8)  | 50.6<br>(17.2)  | 55.8<br>(7.7)   |               |                 |
|                   | <i>p</i> -value         |                 | 0.02            | 0.00            | 0.21          |                 |
| LDL               | People with diabetes    | 82.6<br>(47.0)  | 92.8<br>(54.4)  | 98.8<br>(52.2)  | 0.56          | 0.57            |
|                   | People with no diabetes | 115.2<br>(31.2) | 133.4<br>(40.1) | 116.7<br>(21.0) |               |                 |
|                   | <i>p</i> -value         |                 | 0.00            | 0.00            | 0.45          |                 |

**Table S5.** Predict the diabetes by using all feature or blood glucose.

| Database           | Platform      | Accuracy <sup>a</sup> | Accuracy <sup>b</sup> |
|--------------------|---------------|-----------------------|-----------------------|
| <b>Luzho</b>       | Random Forest | 0.81                  | 0.76                  |
|                    | J48           | 0.79                  | 0.76                  |
|                    | FNN           | 0.78                  | 0.76                  |
| <b>Pima Indian</b> | Random Forest | 0.76                  | 0.67                  |
|                    | J48           | 0.73                  | 0.69                  |
|                    | FNN           | 0.77                  | 0.72                  |

<sup>a</sup> accuracy when all parameters are included. <sup>b</sup> accuracy when blood glucose just included.

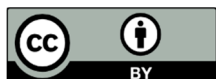

© 2020 by the author. Licensee MDPI, Basel, Switzerland. This article is an open access article distributed under the terms and conditions of the Creative Commons Attribution (CC BY) license (<http://creativecommons.org/licenses/by/4.0/>).
